# Supplementary material for: Role of cyclooxygenase-2-mediated prostaglandin E2-prostaglandin E receptor 4 signaling in cardiac reprogramming
Source: PubMed Central journal article supplement (PMC6382796; doi:10.1038/s41467-019-08626-y), 2019-02-20
Supplement: 41467_2019_8626_MOESM3_ESM.pdf [file 41467_2019_8626_MOESM3_ESM.pdf]

## **Description of Additional Supplementary Files**

### **Supplementary Movie 1.**

Spontaneous  $\text{Ca}^{2+}$  oscillations in GHMT/diclofenac-induced iCMs cultured for 6 weeks.

### **Supplementary Movie 2.**

Spontaneous beating of GHMT/diclofenac-induced iCMs cultured for 6 weeks.
